# Supplementary material
Source: PubMed Central journal article supplement (PMC5703813)
Supplement: JCM.00970-17_zjm012175722s4.pdf [file JCM.00970-17_zjm012175722s4.pdf]

Table S1. Summary of open reading frames and putative functions from plasmids harvested from *Edwardsiella piscicida* isolates from different hosts and geographic origins. Conserved domains and putative product/function of plasmid-encoded ORFs were predicted using BLASTX, with an e-value cut-off of 1e-02 or lower. Physical maps of complete nucleotide sequences of plasmids harvested from *E. piscicida* are displayed in Figure 7.

| Plasmid Source                                                                    | ORF        | Location (+/-) | Conserved domain; putative product; function                                                                                                                       | alignment and identity | E-value   |
|-----------------------------------------------------------------------------------|------------|----------------|--------------------------------------------------------------------------------------------------------------------------------------------------------------------|------------------------|-----------|
|                                                                                   | Group - 1  | 493..1134 (+)  | RloB superfamily; hypothetical protein of unknown function; most similar to hypothetical protein [ <i>Klebsiella pneumoniae</i> ]; GenBank WP_048991273.1          | 115/202 (57%)          | 4.00E-77  |
| F373.2<br>HL1<br>HL25<br>HL32<br>RBR8<br>ACC69<br>CAQ 8.10<br>CAQ 10.10<br>CAQ 39 | Group - 2  | 1152..1337 (+) | hypothetical protein of unknown function; most similar to hypothetical protein G972_04939 [ <i>Escherichia coli</i> UMEA 3355-1]; GenBank EQZ07072.1               | 37/51 (78%)            | 7.00E-13  |
|                                                                                   | Group - 3  | 1298..1453 (-) | replication initiation factor; most similar to replication initiation protein [ <i>Enterobacter cloacae</i> ]; GenBank WP_048210874.1                              | 34/56 (61%)            | 1.00E-10  |
|                                                                                   | Group - 4  | 1915..2091 (-) | Rop superfamily; RNA polymerase; most similar to RNA polymerase [ <i>Edwardsiella tarda</i> ]; GenBank WP_035607970.1                                              | 40/56 (71%)            | 5.00E-09  |
|                                                                                   | Group - 5  | 3013..499 (+)  | P-loop NTPase superfamily; hypothetical protein of unknown function; most similar to hypothetical protein [ <i>Klebsiella pneumoniae</i> ]; GenBank WP_048991271.1 | 215/419 (51%)          | 8.00E-155 |
|                                                                                   | PB07-309-1 | 677..1144 (+)  | hypothetical protein of unknown function; most similar to hypothetical protein [Enterobacteriaceae]; GenBank WP_039023474.1                                        | 127/151 (84%)          | 1.00E-89  |
| PB 07-309                                                                         | PB07-309-2 | 1328..1483 (-) | hypothetical protein of unknown function; most similar to replication initiation protein [Enterobacter]; GenBank WP_052684121.1                                    | 29/42 (69%)            | 9.00E-10  |
|                                                                                   | PB07-309-3 | 1946..2242 (-) | hypothetical protein of unknown function; most similar to hypothetical protein [ <i>Edwardsiella tarda</i> ]; GenBank WP_034166090.1                               | 24/36 (67%)            | 1.00E-08  |

|          |            |                |                                                                                                                                                                |                |           |
|----------|------------|----------------|----------------------------------------------------------------------------------------------------------------------------------------------------------------|----------------|-----------|
|          | PB07-309-4 | 2744..279 (-)  | hypothetical protein of unknown function; most similar to hypothetical protein [ <i>Escherichia coli</i> ]; GenBank WP_052266651.1                             | 170/192 (89%)  | 1.00E-122 |
|          | S11-285-1  | 10..606 (+)    | hypothetical protein of unknown function; most similar to hypothetical protein [ <i>Edwardsiella tarda</i> ]; GenBank WP_034166090.1                           | 140/147 (95%)  | 2.00E-91  |
| S11-285  | S11-285-2  | 879..1529 (+)  | hypothetical protein of unknown function; most similar to hypothetical protein [ <i>Pectobacterium carotovorum</i> ]; GenBank WP_039520268.1                   | 181/216 (84%)  | 4.00E-133 |
|          | S11-285-3  | 1596..2534 (-) | Replicase superfamily; replicase protein most similar to replicase [Enterobacteriaceae]; GenBank WP_038870790.1                                                | 257/308 (83%)  | 2.00E-179 |
| SC 09-03 | SC09-03-1  | 397..702 (-)   | hypothetical protein of unknown function; most similar to hypothetical protein [uncultured bacterium]; GenBank AET87465.1                                      | 101/101 (100%) | 8.00E-65  |
|          | SC09-03-2  | 734..880 (-)   | hypothetical protein of unknown function; most similar to Resolvase (plasmid) [ <i>Citrobacter freundii</i> ]; GenBank AKJ18929.1                              | 47/48 (98%)    | 4.00E-25  |
|          | SC09-03-3  | 968..1096 (+)  | PFL_4706 family; conjugal transfer protein most similar to hypothetical protein, partial [ <i>Bacillus cereus</i> ]; GenBank WP_000306031.1                    | 43/43 (100%)   | 3.00E-21  |
|          | SC09-03-4  | 1152..2417 (-) | MFS superfamily; tetracycline resistance protein most similar to tetracycline resistance protein A [ <i>Laribacter hongkongensis</i> ]; GenBank AAW83817.1     | 421/421 (100%) | 0.0       |
|          | SC09-03-5  | 2421..3128 (+) | TetR superfamily; tetracycline repressor protein most similar to tetracycline repressor protein TetR [ <i>Plesiomonas</i> sp. ZOR0011]; GenBank WP_047706566.1 | 202/203 (99%)  | 2.00E-133 |
|          | SC09-03-6  | 3133..3270 (+) | plasmid replication protein most similar to replication protein C [ <i>Candidatus snodgrassella</i> sp. T4_34144]; GenBank AFV98734.1                          | 46/46 (100%)   | 3.00E-24  |

|            |                  |                                                                                                                                                           |                |           |
|------------|------------------|-----------------------------------------------------------------------------------------------------------------------------------------------------------|----------------|-----------|
| SC09-03-7  | 3439..3879 (+)   | Rep_3 superfamily; plasmid replication protein most similar to MULTISPECIES: hypothetical protein [Chlamydia]; GenBank WP_030122376.1                     | 145/146 (99%)  | 1.00E-100 |
| SC09-03-8  | 4037..4915 (-)   | P-loop_NTPase superfamily; replication protein most similar to RepA [ <i>Chlamydia suis</i> ]; GenBank AAR96040.1                                         | 292/292 (100%) | 0.0       |
| SC09-03-9  | 4944..5270 (-)   | hypothetical protein of unknown function; most similar to hypothetical protein [ <i>Gulbenkiania indica</i> ]; GenBank WP_055434597.1                     | 107/108 (99%)  | 2.00E-52  |
| SC09-03-10 | 5267..5593 (-)   | PemK superfamily; growth inhibitor protein most similar to putative PemK-like protein [ <i>Chlamydia trachomatis</i> RC-F(s)/852]; GenBank AGR96051.1     | 108/108 (100%) | 1.00E-70  |
| SC09-03-11 | 5590..5814 (-)   | DUF3018 superfamily; hypothetical protein of unknown function most similar to MULTISPECIES: hypothetical protein [Proteobacteria]; GenBank WP_043149934.1 | 74/74 (100%)   | 9.00E-46  |
| SC09-03-12 | 5881..8553 (-)   | Relaxase superfamily; mobilization protein most similar to mobilization protein [ <i>Enterobacter</i> sp. GN02768]; GenBank WP_047353284.1                | 890/890 (100%) | 0.0       |
| SC09-03-13 | 8543..8857       | mobilization protein; most similar to mobilization protein B [ <i>Aeromonas salmonicida</i> subsp. <i>salmonicida</i> ]; GenBank AIM49702.1               | 104/104 (100%) | 6.00E-68  |
| SC09-03-14 | 9149..9526 (+)   | mobilization protein; most similar to MobC [ <i>Chlamydia suis</i> ]; GenBank AAR96037.1                                                                  | 124/125 (99%)  | 2.00E-59  |
| SC09-03-15 | 9539..10222 (+)  | mobilization protein; most similar to MULTISPECIES: protein mobD [Bacteria]; GenBank WP_009873358.1                                                       | 227/227 (100%) | 6.00E-148 |
| SC09-03-16 | 10215..10853 (+) | mobilization protein; most similar to MULTISPECIES: protein mobE [Bacteria]; GenBank WP_009873359.1                                                       | 212/212 (100%) | 8.00E-117 |

|            |                  |                                                                                                                                                                                                      |                |           |
|------------|------------------|------------------------------------------------------------------------------------------------------------------------------------------------------------------------------------------------------|----------------|-----------|
| SC09-03-17 | 10850..11602 (+) | hypothetical protein of unknown function; most similar to MULTISPECIES: OfxX fusion product [Bacteria]; GenBank WP_009873360.1                                                                       | 250/250 (100%) | 2.00E-128 |
| 43644      | 43644-1          | 184..594 (+)<br>hypothetical protein of unknown function; most similar to hypothetical protein [ <i>Escherichia coli</i> ]; GenBank WP_044864692.1                                                   | 129/136 (94%)  | 5.00E-84  |
|            | 43644-2          | 854..1417 (+)<br>DnaK domain; molecular chaperone involved in posttranslational modification and protein turnover; most similar to hypothetical protein [Enterobacteriaceae]; GenBank WP_001749520.1 | 159/187 (85%)  | 1.00E-112 |
|            | 43644-3          | 1452..1934 (-)<br>hypothetical protein of unknown function; most similar to hypothetical protein [Enterobacteriaceae]; GenBank WP_000043122.1                                                        | 134/151 (89%)  | 2.00E-90  |
|            | 43644-4          | 2915..3358 (-)<br>hypothetical protein of unknown function; most similar to hypothetical protein [ <i>Edwardsiella tarda</i> ]; GenBank WP_034166090.1                                               | 142/147 (97%)  | 2.00E-95  |
